# Supplementary material
Source: MDPI journal article supplement (https://www.mdpi.com/1424-8247/14/7/604)
Supplement: s1 [file s1]

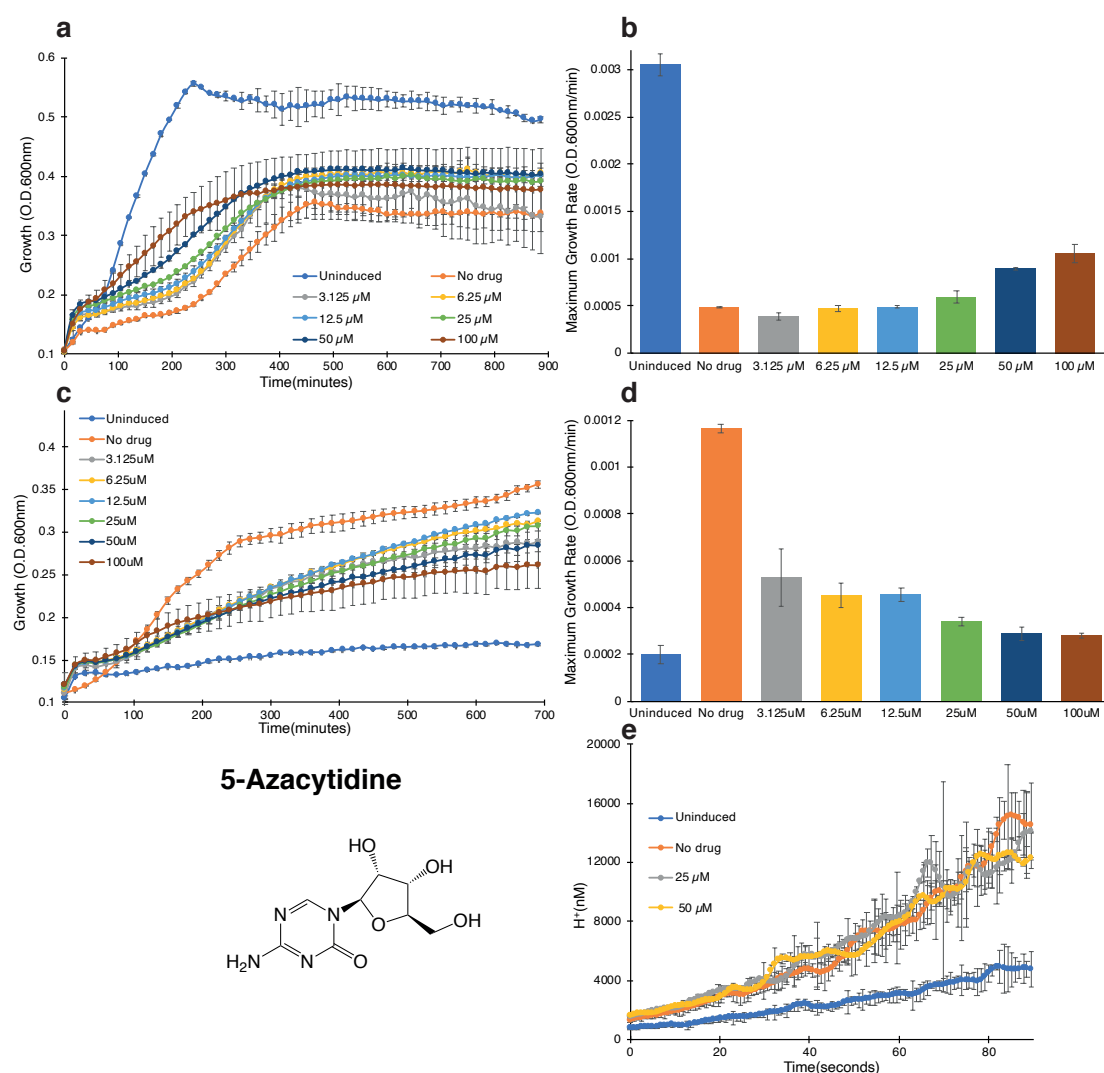

**Figure S1.** Raw screening data for 5-Azacytidine. a. Negative assay in which SARS-CoV-2 E protein is expressed at an elevated level (induced with 100  $\mu$ M [ $\beta$ -D-1-thiogalactopyranoside]) and is therefore deleterious to bacteria. The different concentrations of the drug are indicated. b. Maximal growth rates obtained in the negative assay. c. Positive assay in which SARS-CoV-2 E protein is expressed at a low level (induced with 20  $\mu$ M [ $\beta$ -D-1-thiogalactopyranoside]) in  $K^+$ -uptake deficient bacteria [31]. In this instance, inhibitory drugs reduce bacterial growth. d. Maximal growth rates obtained in the positive assay. e. Fluorescence-based conductivity assay. The fluorescence of bacteria that harbor a pH-sensitive GFP [32] and express the SARS-CoV-2 E protein was examined as a function of different chemical concentration as noted. The experiment was performed as previously described [33], whereby at time 0, a concentrated solution of citric acid was injected into the media. In all panels LB indicates bacteria that do not express the channel as a positive control, while 100  $\mu$ M IPTG indicates no drug added as a negative control.

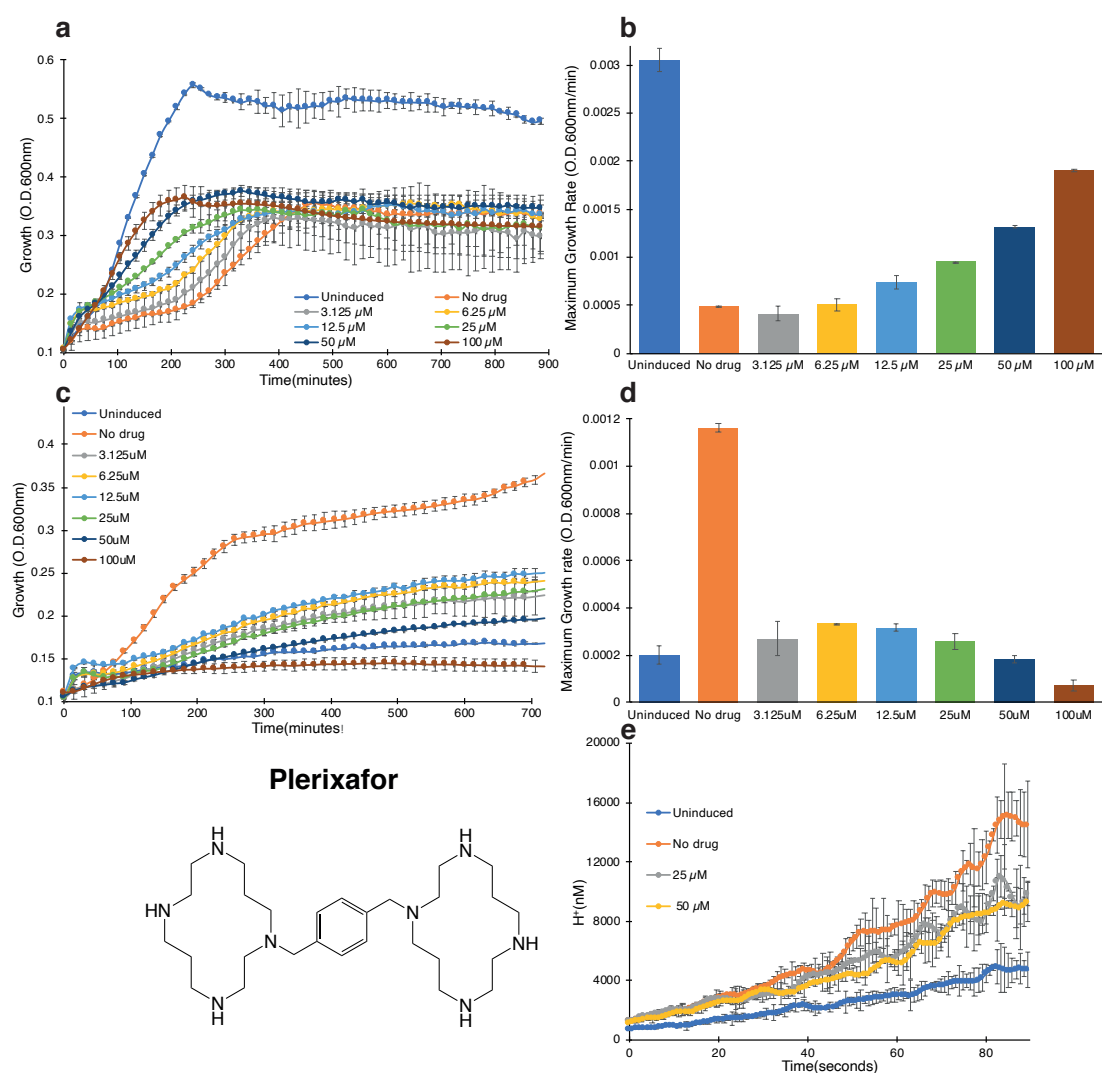

**Figure S2.** Raw screening data for Plerixafor. a. Negative assay in which SARS-CoV-2 E protein is expressed at an elevated level (induced with 100  $\mu$ M [ $\beta$ -D-1-thiogalactopyranoside]) and is therefore deleterious to bacteria. The different concentrations of the drug are indicated. b. Maximal growth rates obtained in the negative assay. c. Positive assay in which SARS-CoV-2 E protein is expressed at a low level (induced with 20  $\mu$ M [ $\beta$ -D-1-thiogalactopyranoside]) in K<sup>+</sup>-uptake deficient bacteria [31]. In this instance, inhibitory drugs reduce bacterial growth. d. Maximal growth rates obtained in the positive assay. e. Fluorescence-based conductivity assay. The fluorescence of bacteria that harbor a pH-sensitive GFP [32] and express the SARS-CoV-2 E protein was examined as a function of different chemical concentration as noted. The experiment was performed as previously described [33], whereby at time 0, a concentrated solution of citric acid was injected into the media. In all panels LB indicates bacteria that do not express the channel as a positive control, while 100  $\mu$ M IPTG indicates no drug added as a negative control.

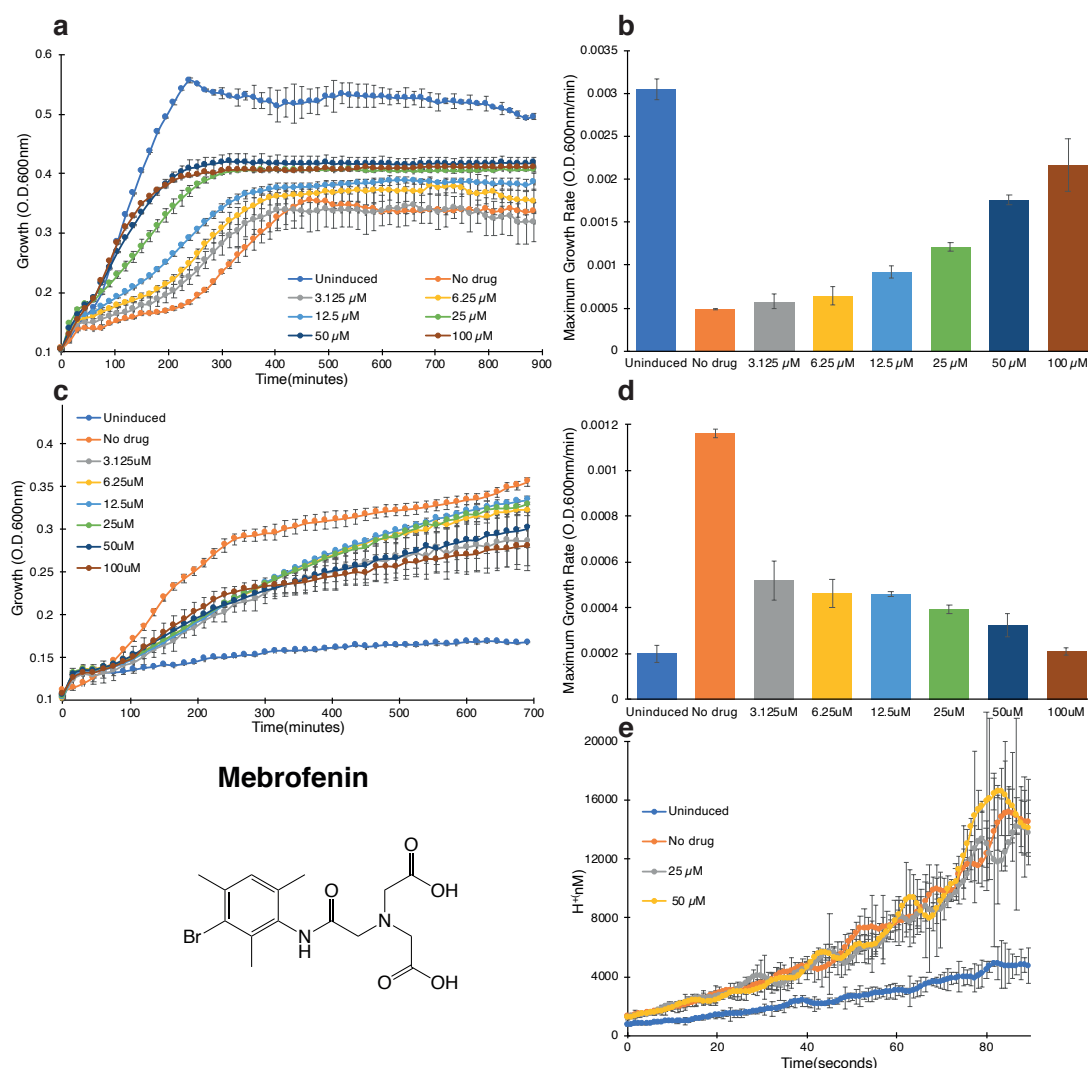

**Figure S3.** Raw screening data for Mebrofenin. a. Negative assay in which SARS-CoV-2 E protein is expressed at an elevated level (induced with 100  $\mu$ M [ $\beta$ -D-1-thiogalactopyranoside]) and is therefore deleterious to bacteria. The different concentrations of the drug are indicated. b. Maximal growth rates obtained in the negative assay. c. Positive assay in which SARS-CoV-2 E protein is expressed at a low level (induced with 20  $\mu$ M [ $\beta$ -D-1-thiogalactopyranoside]) in K<sup>+</sup>-uptake deficient bacteria [31]. In this instance, inhibitory drugs reduce bacterial growth. d. Maximal growth rates obtained in the positive assay. e. Fluorescence-based conductivity assay. The fluorescence of bacteria that harbor a pH-sensitive GFP [32] and express the SARS-CoV-2 E protein was examined as a function of different chemical concentration as noted. The experiment was performed as previously described [33], whereby at time 0, a concentrated solution of citric acid was injected into the media. In all panels LB indicates bacteria that do not express the channel as a positive control, while 100  $\mu$ M IPTG indicates no drug added as a negative control.

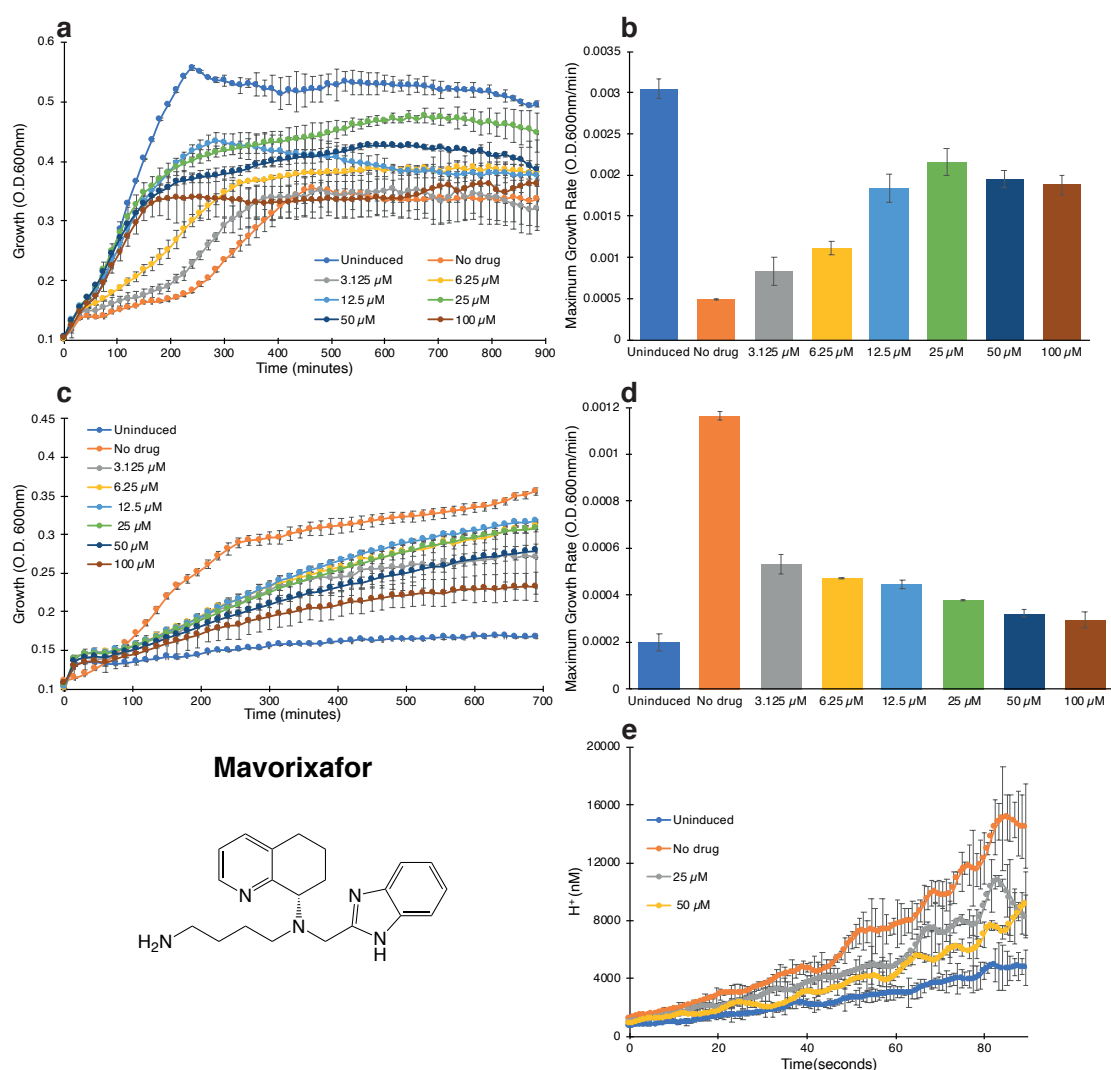

**Figure S4.** Raw screening data for Mavorixafor. a. Negative assay in which SARS-CoV-2 E protein is expressed at an elevated level (induced with 100  $\mu$ M [ $\beta$ -D-1-thiogalactopyranoside]) and is therefore deleterious to bacteria. The different concentrations of the drug are indicated. b. Maximal growth rates obtained in the negative assay. c. Positive assay in which SARS-CoV-2 E protein is expressed at a low level (induced with 20  $\mu$ M [ $\beta$ -D-1-thiogalactopyranoside]) in K<sup>+</sup>-uptake deficient bacteria [31]. In this instance, inhibitory drugs reduce bacterial growth. d. Maximal growth rates obtained in the positive assay. e. Fluorescence-based conductivity assay. The fluorescence of bacteria that harbor a pH-sensitive GFP [32] and express the SARS-CoV-2 E protein was examined as a function of different chemical concentration as noted. The experiment was performed as previously described [33], whereby at time 0, a concentrated solution of citric acid was injected into the media. In all panels LB indicates bacteria that do not express the channel as a positive control, while 100  $\mu$ M IPTG indicates no drug added as a negative control.

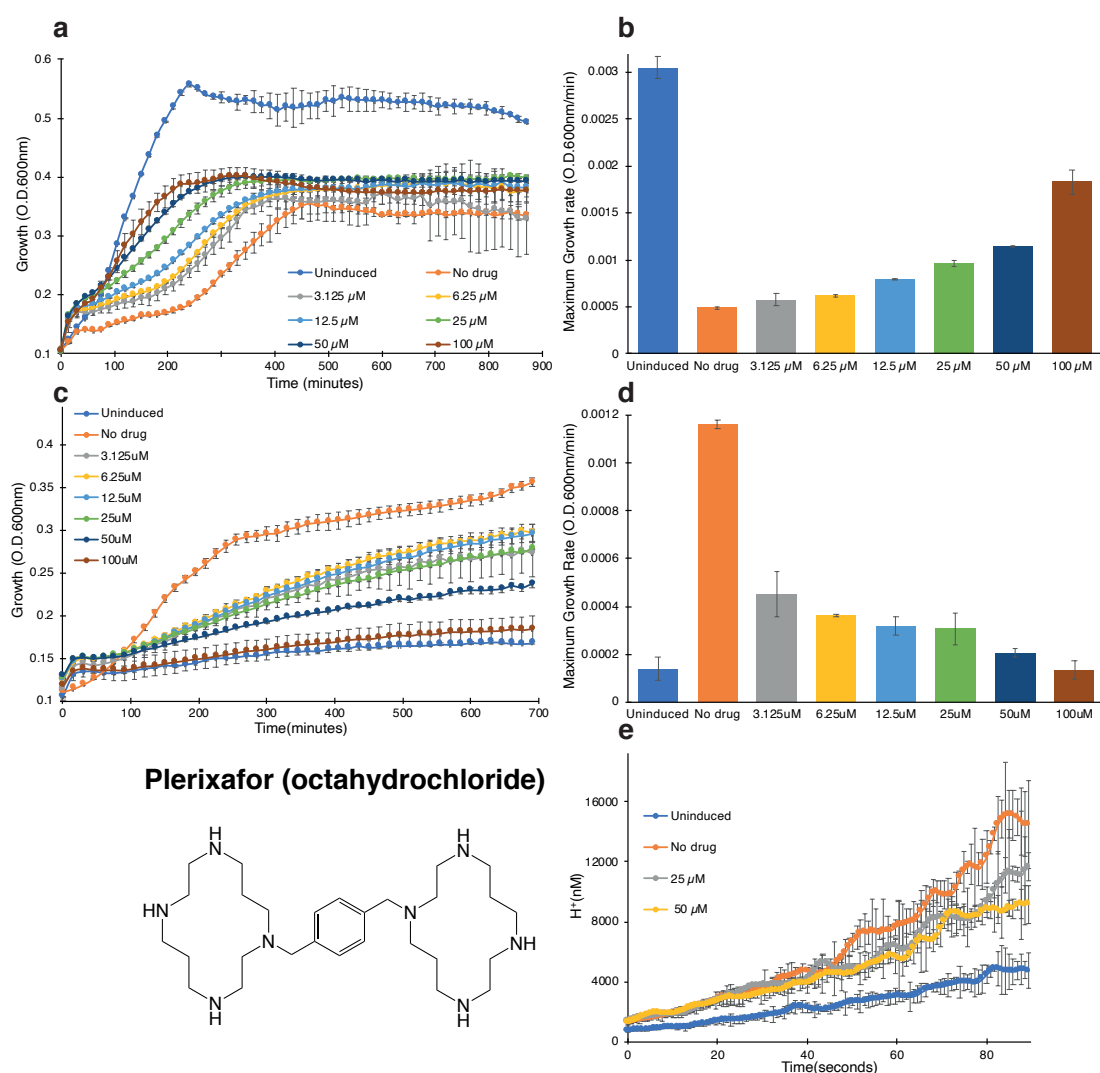

**Figure S5.** Raw screening data for Plerixafor (octahydrochloride). a. Negative assay in which SARS-CoV-2 E protein is expressed at an elevated level (induced with 100  $\mu$ M [ $\beta$ -D-1-thiogalactopyranoside]) and is therefore deleterious to bacteria. The different concentrations of the drug are indicated. b. Maximal growth rates obtained in the negative assay. c. Positive assay in which SARS-CoV-2 E protein is expressed at a low level (induced with 20  $\mu$ M [ $\beta$ -D-1-thiogalactopyranoside]) in K<sup>+</sup>-uptake deficient bacteria [31]. In this instance, inhibitory drugs reduce bacterial growth. d. Maximal growth rates obtained in the positive assay. e. Fluorescence-based conductivity assay. The fluorescence of bacteria that harbor a pH-sensitive GFP [32] and express the SARS-CoV-2 E protein was examined as a function of different chemical concentration as noted. The experiment was performed as previously described [33], whereby at time 0, a concentrated solution of citric acid was injected into the media. In all panels LB indicates bacteria that do not express the channel as a positive control, while 100  $\mu$ M IPTG indicates no drug added as a negative control.

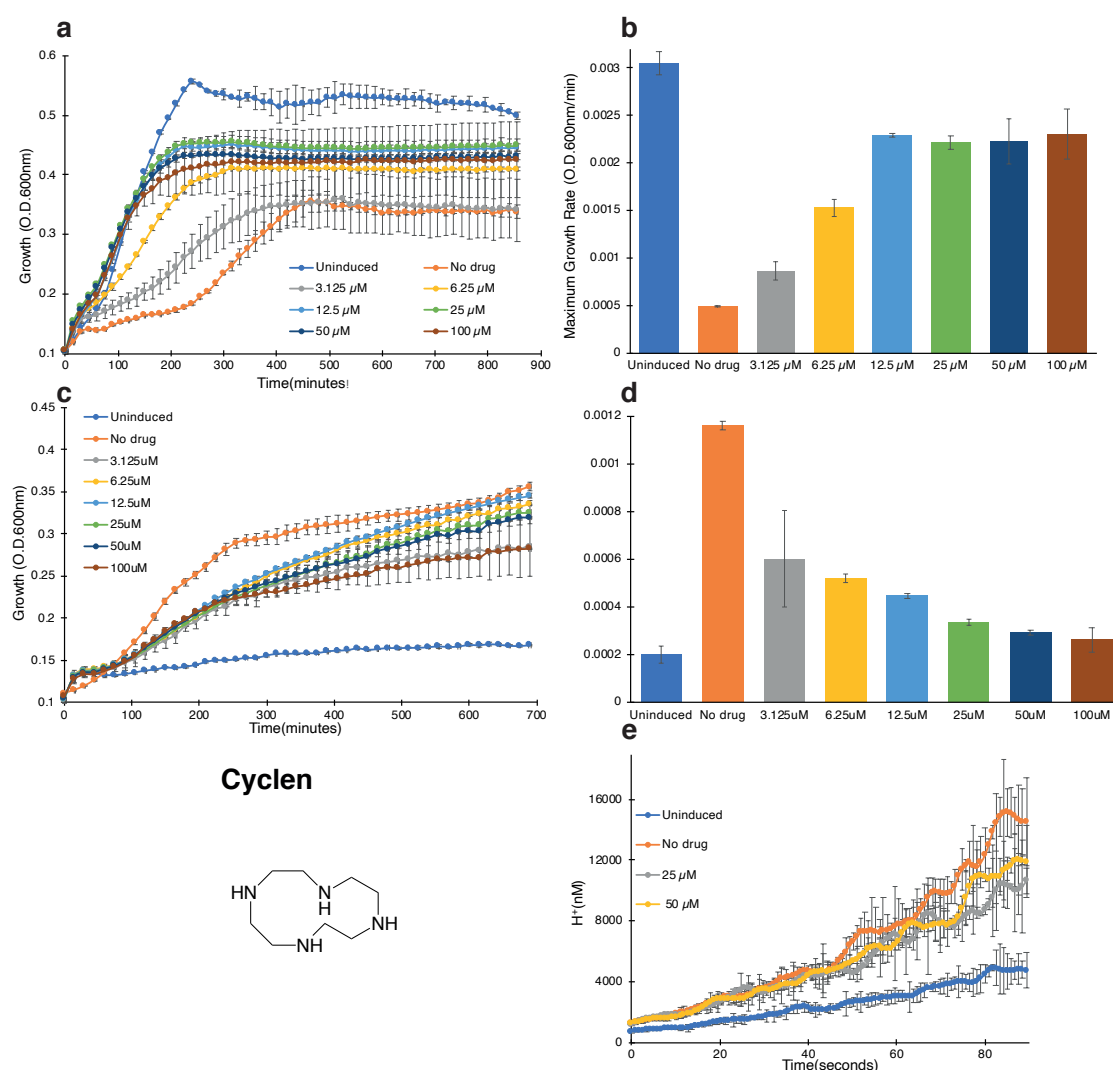

**Figure S6.** Raw screening data for Cyclen. a. Negative assay in which SARS-CoV-2 E protein is expressed at an elevated level (induced with 100  $\mu$ M [ $\beta$ -D-1-thiogalactopyranoside]) and is therefore deleterious to bacteria. The different concentrations of the drug are indicated. b. Maximal growth rates obtained in the negative assay. c. Positive assay in which SARS-CoV-2 E protein is expressed at a low level (induced with 20  $\mu$ M [ $\beta$ -D-1-thiogalactopyranoside]) in K<sup>+</sup>-uptake deficient bacteria [31]. In this instance, inhibitory drugs reduce bacterial growth. d. Maximal growth rates obtained in the positive assay. e. Fluorescence-based conductivity assay. The fluorescence of bacteria that harbor a pH-sensitive GFP [32] and express the SARS-CoV-2 E protein was examined as a function of different chemical concentration as noted. The experiment was performed as previously described [33], whereby at time 0, a concentrated solution of citric acid was injected into the media. In all panels LB indicates bacteria that do not express the channel as a positive control, while 100  $\mu$ M IPTG indicates no drug added as a negative control.

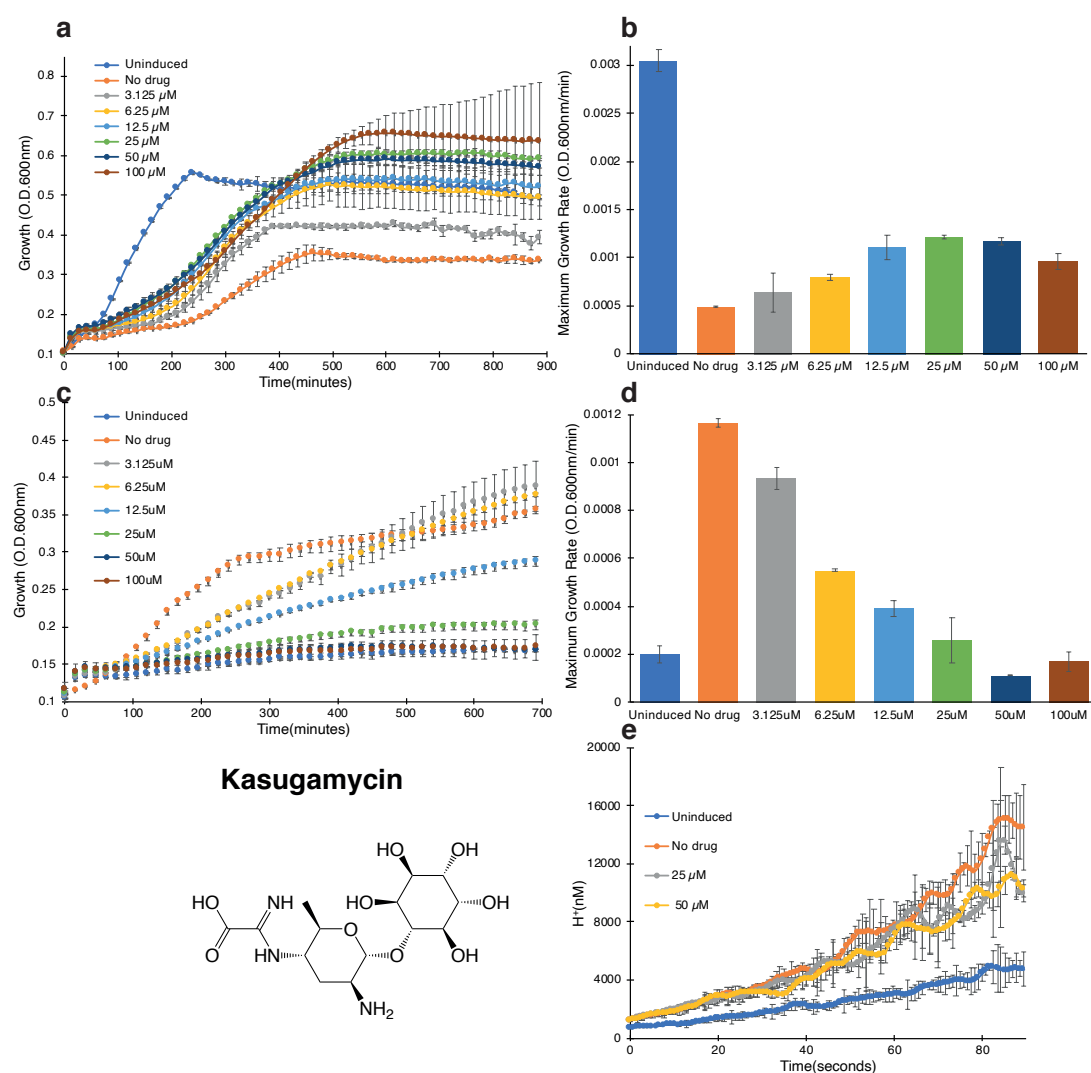

**Figure S7.** Raw screening data for Kasugamycin a. Negative assay in which SARS-CoV-2 E protein is expressed at an elevated level (induced with 100  $\mu$ M [ $\beta$ -D-1-thiogalactopyranoside]) and is therefore deleterious to bacteria. The different concentrations of the drug are indicated. b. Maximal growth rates obtained in the negative assay. c. Positive assay in which SARS-CoV-2 E protein is expressed at a low level (induced with 20  $\mu$ M [ $\beta$ -D-1-thiogalactopyranoside]) in  $K^+$ -uptake deficient bacteria [31]. In this instance, inhibitory drugs reduce bacterial growth. d. Maximal growth rates obtained in the positive assay. e. Fluorescence-based conductivity assay. The fluorescence of bacteria that harbor a pH-sensitive GFP [32] and express the SARS-CoV-2 E protein was examined as a function of different chemical concentration as noted. The experiment was performed as previously described [33], whereby at time 0, a concentrated solution of citric acid was injected into the media. In all panels LB indicates bacteria that do not express the channel as a positive control, while 100  $\mu$ M IPTG indicates no drug added as a negative control.

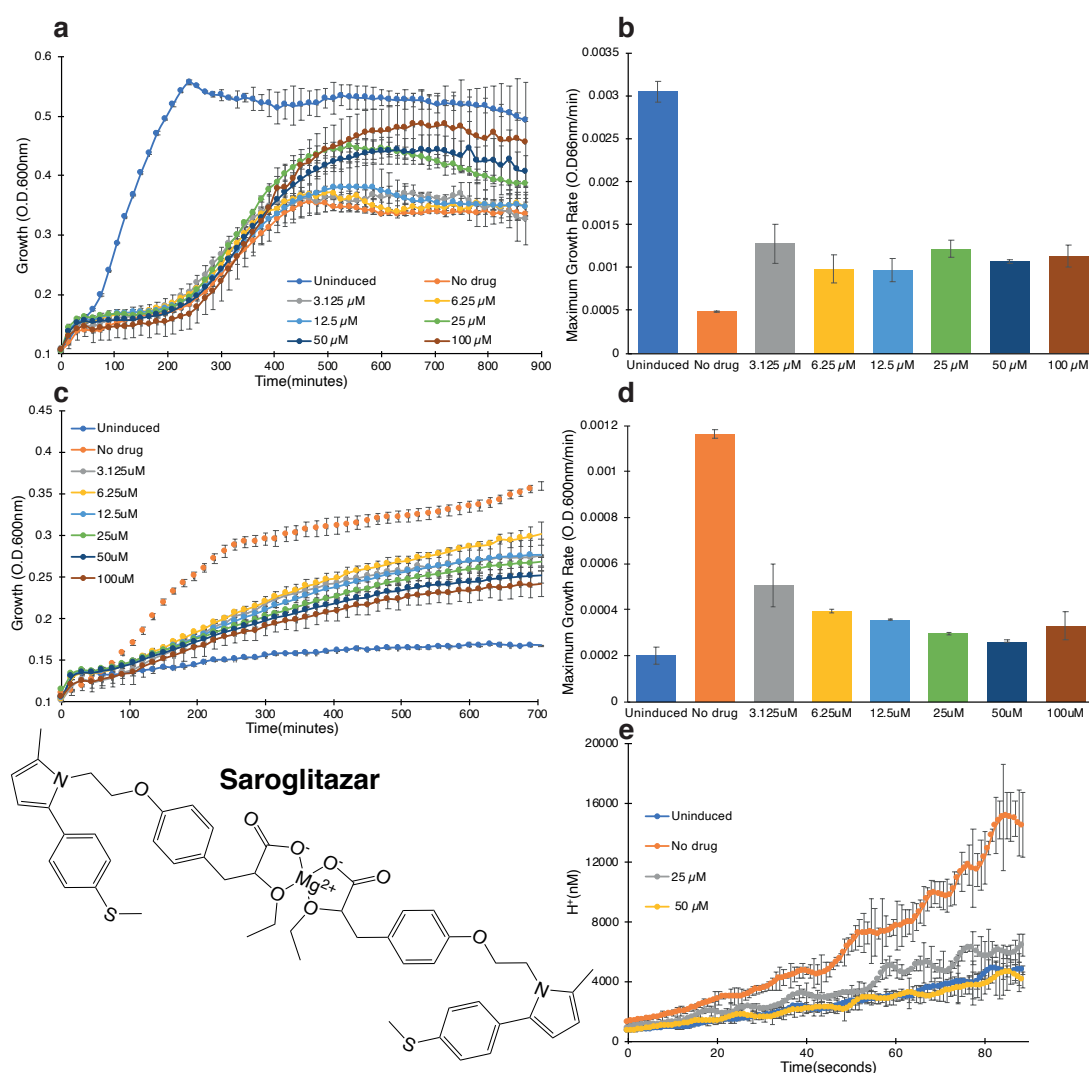

**Figure S8.** Raw screening data for Saroglitzazar. a. Negative assay in which SARS-CoV-2 E protein is expressed at an elevated level (induced with 100  $\mu$ M [ $\beta$ -D-1-thiogalactopyranoside]) and is therefore deleterious to bacteria. The different concentrations of the drug are indicated. b. Maximal growth rates obtained in the negative assay. c. Positive assay in which SARS-CoV-2 E protein is expressed at a low level (induced with 20  $\mu$ M [ $\beta$ -D-1-thiogalactopyranoside]) in K<sup>+</sup>-uptake deficient bacteria [31]. In this instance, inhibitory drugs reduce bacterial growth. d. Maximal growth rates obtained in the positive assay. e. Fluorescence-based conductivity assay. The fluorescence of bacteria that harbor a pH-sensitive GFP [32] and express the SARS-CoV-2 E protein was examined as a function of different chemical concentration as noted. The experiment was performed as previously described [33], whereby at time 0, a concentrated solution of citric acid was injected into the media. In all panels LB indicates bacteria that do not express the channel as a positive control, while 100  $\mu$ M IPTG indicates no drug added as a negative control.
